# Supplementary material for: Layer by layer supported laccase on lignin nanoparticles catalyzes the selective oxidation of alcohols to aldehydes
Source: Royal Society of Chemistry journal article supplement (doi:10.1039/c9cy00962k), 2019-01-01
Supplement: c9cy00962k1.pdf [file c9cy00962k1.pdf]

## Supporting Information

### Layer by Layer Supported Laccase on Lignin Nanoparticles catalyzes the selective Oxidation of Alcohols to Aldehydes

Davide Piccinino<sup>[a]</sup>, Eliana Capecchi<sup>[a]</sup>, Lorenzo Botta<sup>[a]</sup>, Paolo Bollella<sup>[b]</sup>, Riccarda Antiochia<sup>[b]</sup>, Marcello Crucianelli<sup>[c]</sup>, and Raffaele Saladino<sup>[a]\*</sup>

<sup>[a]</sup>Department of Biological and Ecological Sciences, University of Tuscia, Via S. Camillo de Lellis snc, 01100 Viterbo, Italy

<sup>[b]</sup>Department of Chemistry and Drug Technologies, Sapienza University of Rome P.le Aldo Moro 5, 00185 Rome, Italy

<sup>[c]</sup>Department of Physical and Chemical Sciences, University of Aquila, Via Vetoio I, Coppito, 67100 Aquila, Italy

#### Contents

**SI #1** SEM image of catalyst **IV** after the sixth run of oxidation of alcohol **3**.

**SI #2** Phosphorus Nuclear Magnetic Resonance <sup>31</sup>P-NMR analysis of phosphitylated lignin organosolv and cationic lignin (CATLIG) samples

**SI #1** SEM analysis of catalyst **IV** after the sixth run of oxidation of alcohol **3**.

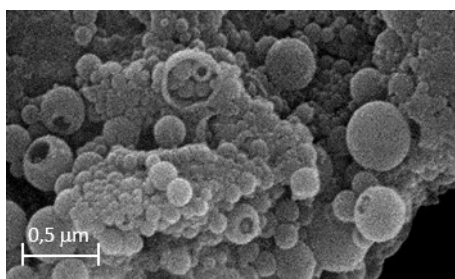

Figure S1. SEM analysis of catalyst **IV** after the sixth run of oxidation of alcohol **3**. The analysis showed a complete integrity of the support.

**SI #2** Phosphorus Nuclear Magnetic Resonance (<sup>31</sup>P-NMR) analysis of phosphitylated lignin organosolv and cationic lignin (CATLIG) samples

The qualitative and quantitative analysis of phenolic moieties in organosolv lignin (OL) and in cationic lignin (CATLIG) were determined by <sup>31</sup>P-NMR analysis<sup>1</sup>. Typically, the appropriate sample (10 mg) was dissolved in pyridine/CDCl<sub>3</sub> (300 μL; ratio 1.6/1.0 v/v), followed by addition of chrome (III) acetylacetonate solution (50 μL, 11.4 mg/ml) as relaxing agent. Then, the phosphitylation reagent 2-chloro-4,4,5,5-tetramethyl-1,3,2-

dioxaphospholane (200  $\mu$ l) was added under magnetic stirring at 45  $^{\circ}$ C for 2 hours. NMR analysis was performed in the presence of *N*-hydroxy-5-norbornene-2,3-dicarboxylic acid imide (10  $\mu$ mol) as an internal standard on a Bruker 400MHz apparatus. The  $^{31}$ P NMR (ppm) characteristic range for any OH groups have been derived from literature<sup>2,3</sup>.

The increase of the signal relative to aliphatic OH groups and the decrease of remaining OH aromatic groups confirmed the cationization reaction of lignin organosolv to yield CATLIG (Figure 1).

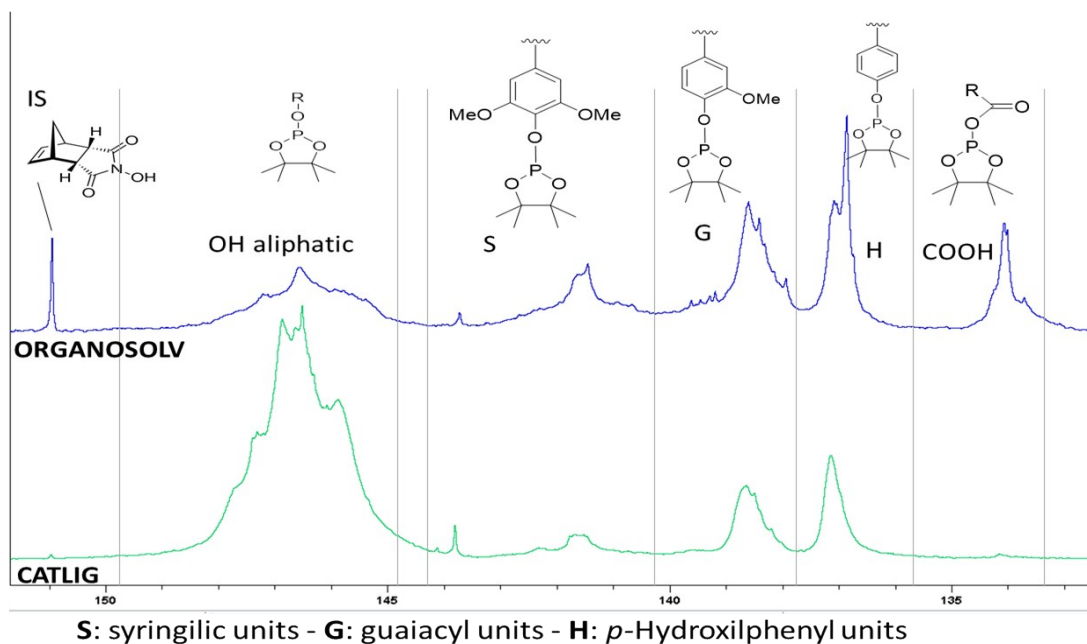

Figure S2.  $^{31}$ P NMR analysis of phosphitylated lignin organosolv and cationic lignin (CATLIG) in presence of internal standard (*N*-hydroxy-5-norbornene-2,3-dicarboxylic acid imide).

## References

- 1 A. Granata, D.S. Argyropoulos, *J. Agric. Food Chem.* 1995, **43**, 1538
- 2 F. Melone, R. Saladino, H. Lange, C. Crestini, *J. Agric. Food Chem.* 2013, **61**, 9307
- 3 Y. Pu, S. Cao, A.J. Ragauskas, *Energy Environ. Sci.* 2011, **4**, 3154-3166.
